# Supplementary material for: Metabolic Surgery in the Treatment Algorithm for Type 2 Diabetes: A Joint Statement by International Diabetes Organizations
Source: Oxford University Press journal article supplement (doi:10.2337/dc16-0236), 2016-05-13
Supplement: dc160236supplementarydata.pdf [file dc160236supplementarydata.pdf]

## SUPPLEMENTARY DATA

### **Supplementary Table 1. International societies that endorsed the DSS-II conference and the 3rd World Congress on Interventional Therapies for Type 2 Diabetes**

#### **Partner Organizations**

American Diabetes Association (ADA)  
Chinese Diabetes Society (CDS)  
Diabetes India (DI)  
Diabetes UK (DUK)  
European Association for the Study of Diabetes (EASD)  
International Diabetes Federation (IDF)

#### **Representatives of Organizations and Societies Invited to Observe the Proceedings of the DSS-II**

*American Association of Clinical Endocrinologists (AACE)*  
Jeffrey Mechanick, USA  
*American College of Surgeons (ACS)*  
Ali Tavakkoli, USA  
*American Society for Metabolic and Bariatric Surgery (ASMBS)*  
John Morton, USA  
*Association of British Clinical Diabetologists (ABCD)*  
Bob Ryder, UK  
*British Obesity and Metabolic Surgery Society (BOMSS)*  
Roger Ackroyd, UK  
*Czech Society for the Study of Obesity (CSSO)*  
Martin Fried, Czech Republic  
*Endocrine Society*  
Richard Bergman, USA  
*International Federation for the Surgery of Obesity & Metabolic Disorders (IFSO)*  
Antonio Torres, Spain  
*International Federation for the Surgery of Obesity & Metabolic Disorders – European Chapter*  
Michel Suter, Switzerland  
*Italian Society of Bariatric & Metabolic Surgery (SICOB)*  
Nicola Di Lorenzo, Italy  
*Italian Society of Diabetology (SID)*  
Frida Leonetti, Italy  
*Japanese Society of Bariatric and Metabolic Surgery (JSBMS)*  
Kazunori Kasama, Japan  
*National Institute for Health and Care Excellence (NICE)*  
Rachel Batterham, UK  
*National Obesity Forum (NOF)*  
David Haslam, UK  
*NIH/National Institute of Diabetes and Digestive and Kidney Diseases (NIDDK)*  
Karen Teff, USA  
*Swedish Association for Bariatric Surgery (SABS)*  
Torsten Olbers, Sweden

## SUPPLEMENTARY DATA

### **Societies that Endorsed the Joint DSS-II and World Congress Event**

American Association of Clinical Endocrinologists (AACE)  
American College of Surgeons (ACS)  
American Society for Metabolic and Bariatric Surgery (ASMBS)  
Argentinian Society for Bariatric and Metabolic Surgery (SACO)  
Asia-Pacific Bariatric and Metabolic Surgery Society (APBMSS)  
Association for the Study of Obesity (ASO)  
Association of British Clinical Diabetologists (ABCD)  
Brazilian Society of Bariatric and Metabolic Surgery (SBCBM)  
Brazilian Society of Diabetes (SBD)  
British Obesity and Metabolic Surgery Society (BOMSS)  
Czech Society for the Study of Obesity (CSSO)  
Ecuadorian Society of Bariatric and Metabolic Surgery (SECBAMET)  
Endocrine Society  
European Association for the Study of Obesity (EASO)  
French Society of Bariatric and Metabolic Surgery (SOFFCO)  
French Society of Diabetes (SFD)  
German Society for Obesity Surgery (CA-ADIP)  
Hellenic Diabetes Association (HDA)  
International Bariatric Club (IBC)  
International Federation for the Surgery of Obesity & Metabolic Disorders (IFSO)  
Italian Society of Bariatric & Metabolic Surgery (SICOB)  
Italian Society of Diabetology (SID)  
Japanese Society for the Treatment of Obesity (JSTO)  
National Obesity Forum (NOF)  
Obesity and Metabolic Surgery Society of India (OSSI)  
Portuguese Society of Surgery for Obesity and Metabolic Illnesses (SPCO)  
Society for Endocrinology (SfE)  
Society of American Gastrointestinal and Endoscopic Surgeons (SAGES)  
Society of Bariatric Surgeons of Russia (SBSR)  
Swedish Association for Bariatric Surgery (SABS)  
Swiss Society for the Study of Morbid Obesity and Metabolic Disorders (SMOB)  
Turkish Metabolic Surgery Foundation (TMSF)  
Turkish Society for Metabolic and Bariatric Surgery (TSMBS)  
Ukrainian Association of Bariatric Surgery (UABS)
